# Supplementary material for: Sustained Liver HBsAg Loss and Clonal T- and B-Cell Expansion upon Therapeutic DNA Vaccination Require Low HBsAg Levels
Source: MDPI journal article supplement (doi:10.3390/vaccines11121825), 2023-12-06
Supplement: s1 [file s1]

## **SUPPLEMENTARY Appendix:**

### **Table of contents**

#### **Supplemental results:**

**Figure S1. Viral parameters over time of individual mice that were initially transduced with  $2.5 \times 10^9$ vg/ml rAAV-HBV and treated with GalNAc-control siRNA and mock vaccine.**

**Figure S2. Viral parameters over time of individual mice that were initially transduced with AAV-HBV ( $2.5 \times 10^9$ vg/ml) and treated with GalNAc-HBV siRNA and therapeutic vaccine (TxVx).**

**Figure S3. Viral parameters over time of individual mice that were initially transduced with  $2.5 \times 10^9$ vg/ml rAAV-HBV and treated with GalNAc-HBV siRNA and mock vaccine.**

**Figure S4. Viral parameters over time of individual mice that were initially transduced with  $2.5 \times 10^9$ vg/ml rAAV-HBV and treated with GalNAc-control siRNA and therapeutic vaccine (TxVx).**

**Figure S5. Single-cell RNA sequencing QC and annotation.**

**Figure S6. CD8 T cell frequency and pre-exhaustion profiles.**

**Figure S7. Monocyte and DC compartment frequency analysis.**

**Figure S8. ILC compartment frequency analysis.**

**Figure S9. Neutrophil compartment analysis.**

**Figure S10. TCR clonality frequency.**

**Figure S11. B cell compartment analysis.**

**Supplementary Table S1 – Percentage distribution of cell types**

**Supplementary Table S2 – Percentage distribution of CD8 T cell clonal expansion**

**Supplementary Table S3 – Percentage distribution of CD4 T cell clonal expansion**

**Figure S1- Viral parameters over time of individual mice that were initially transduced with  $2.5 \times 10^9$  vg/ml rAAV-HBV and treated with GalNAc-control siRNA and mock vaccine.** Individual-level data are shown; the data corresponds to the mean data plotted in Figure 1. **(A)** Hepatitis B surface antigen levels (HBsAg levels) in IU/ml measured in serum until day 70. **(B)** HBsAg levels in IU/ml measured in serum until day 154. **(C)** Hepatitis B e antigen levels (HBeAg) in IU/ml measured in serum until day 70. **(D)** HBeAg levels in IU/ml measured in serum until day 154. **(E)** Hepatitis B surface antibody levels (HBsAb) in mIU/ml measured in serum until day 70. **(F)** HBsAb levels in mIU/ml measured in serum until day 154. **(G)** alanine aminotransferase (ALT) activity in mU/ml measured in serum until day 70. **(H)** ALT levels measured in serum until day 154.

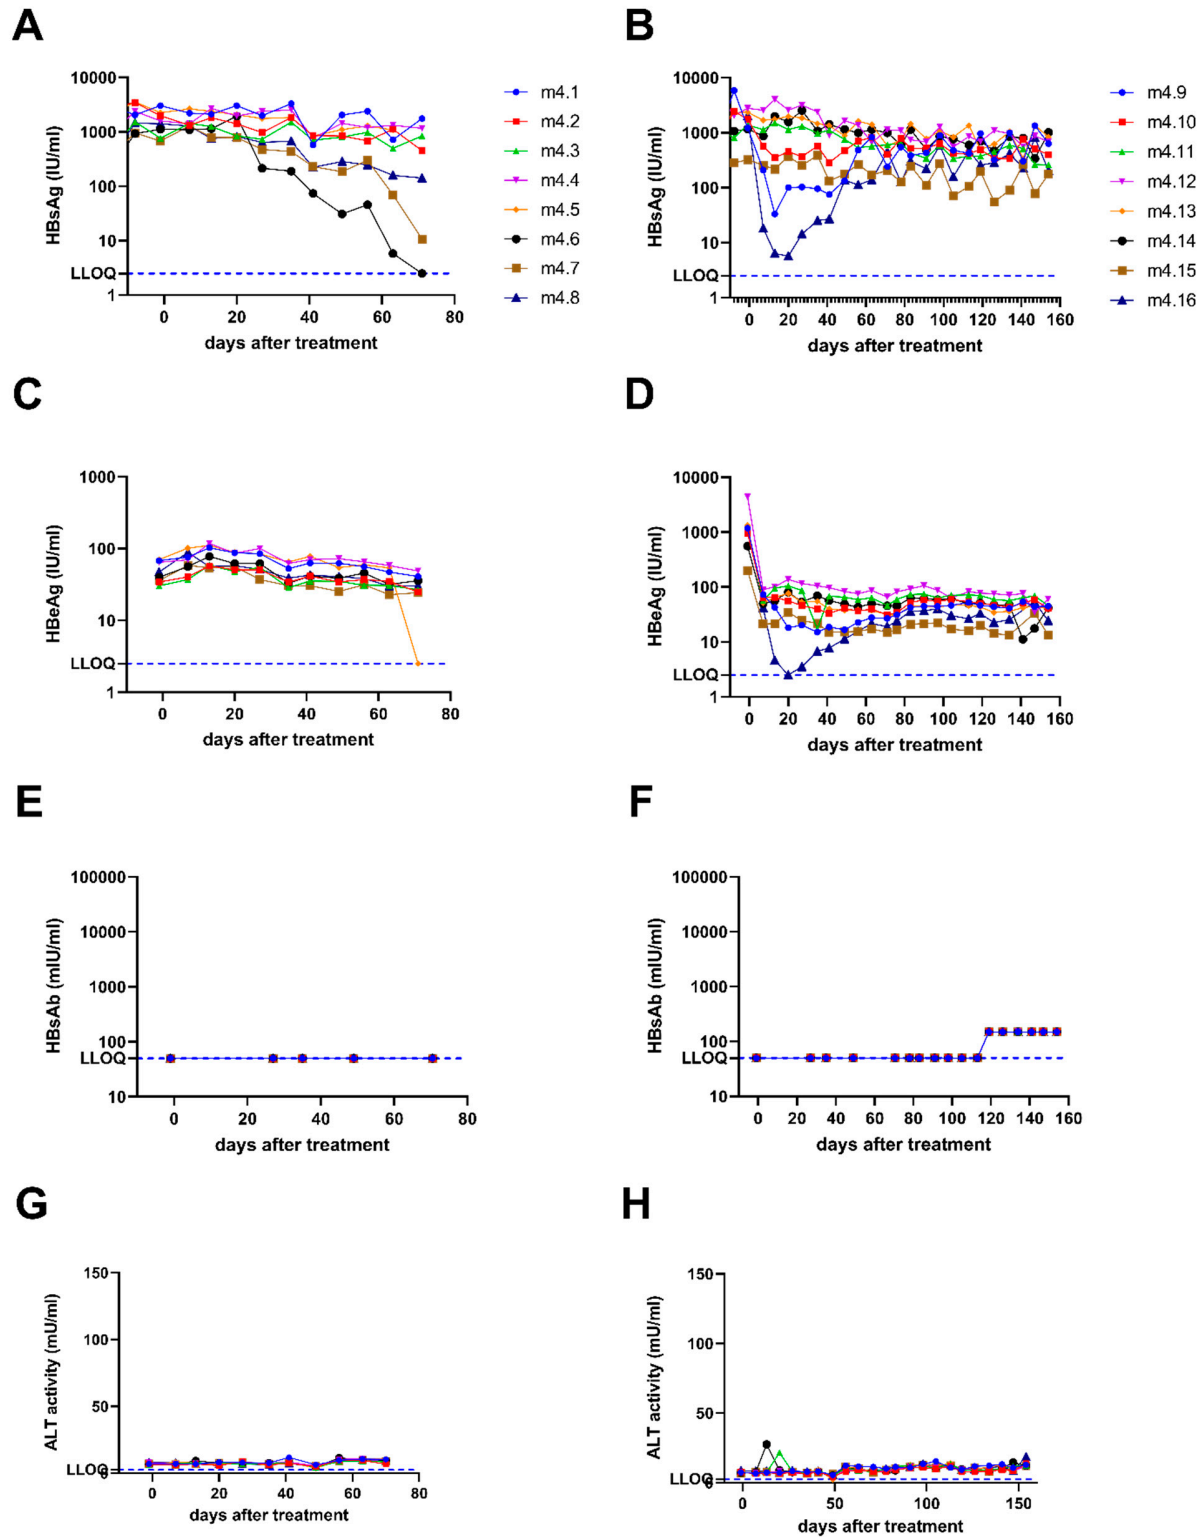

**Figure S2- Viral parameters over time of individual mice that were initially transduced with AAV-HBV ( $2.5 \times 10^9$  vg/ml) and treated with GalNAc-HBV siRNA and therapeutic vaccine (TxVx).** Individual-level data are shown; the data corresponds to the mean data plotted in Figure 1. **(A)** Hepatitis B surface antigen levels (HBsAg levels) in IU/ml measured in serum until day 70. **(B)** HBsAg levels in IU/ml measured in serum until day 154. **(C)** Hepatitis B e antigen levels (HBeAg) in IU/ml measured in serum until day 70. **(D)** HBeAg levels in IU/ml measured in serum until day 154. **(E)** Hepatitis B surface antibody levels (HBsAb) in mIU/ml measured in serum until day 70. **(F)** HBsAb levels in mIU/ml measured in serum until day 154. **(G)** alanine aminotransferase (ALT) activity in mU/ml measured in serum until day 70. **(H)** ALT levels measured in serum until day 154. Dotted blue line represent the lower limit of quantification (LLOQ) of the assay.

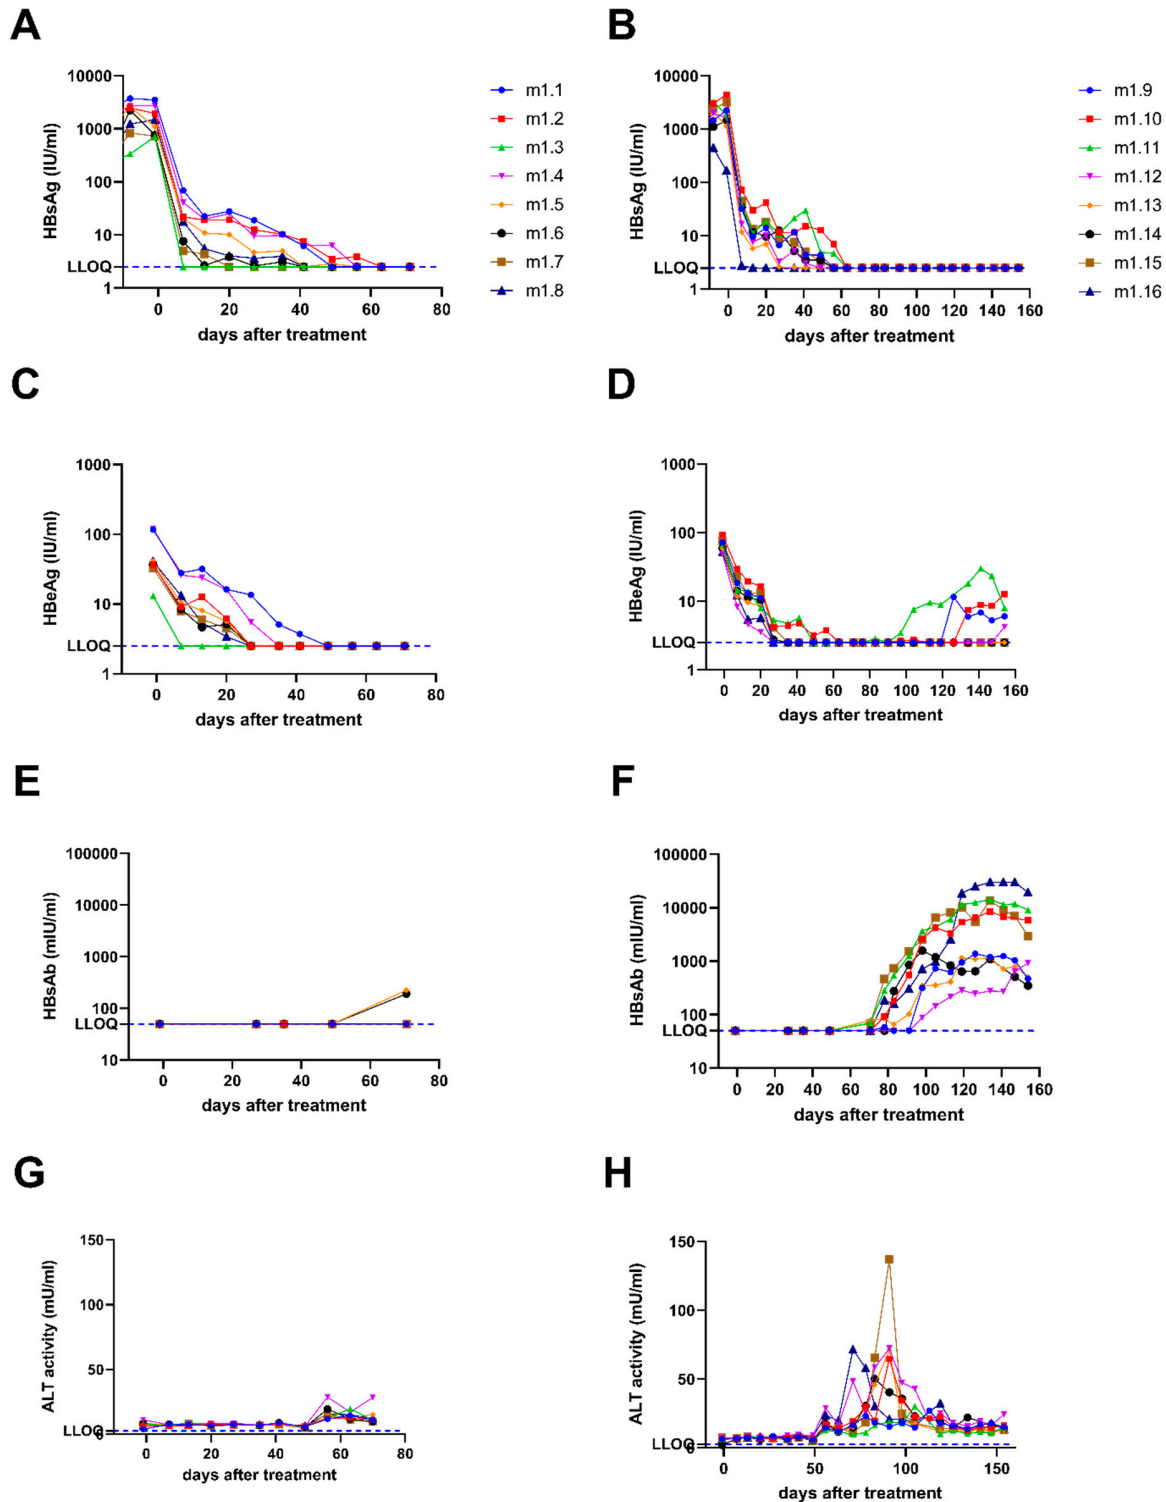

**Figure S3- Viral parameters over time of individual mice that were initially transduced with  $2.5 \times 10^9$  vg/ml rAAV-HBV and treated with GalNAc-HBV siRNA and mock vaccine.** Individual-level data are shown; the data corresponds to the mean data plotted in Figure 1. **(A)** Hepatitis B surface antigen levels (HBsAg levels) in IU/ml measured in serum until day 70. **(B)** HBsAg levels in IU/ml measured in serum until day 154. **(C)** Hepatitis B e antigen levels (HBeAg) in IU/ml measured in serum until day 70. **(D)** HBeAg levels in IU/ml measured in serum until day 154. **(E)** Hepatitis B surface antibody levels (HBsAb in mIU/ml measured in serum until day 70 **(F)** HBsAb levels in mIU/ml measured in serum until day 154. **(G)** alanine aminotransferase (ALT) activity in mU/ml measured in serum until day 70. **(H)** ALT levels measured in serum until day 154.

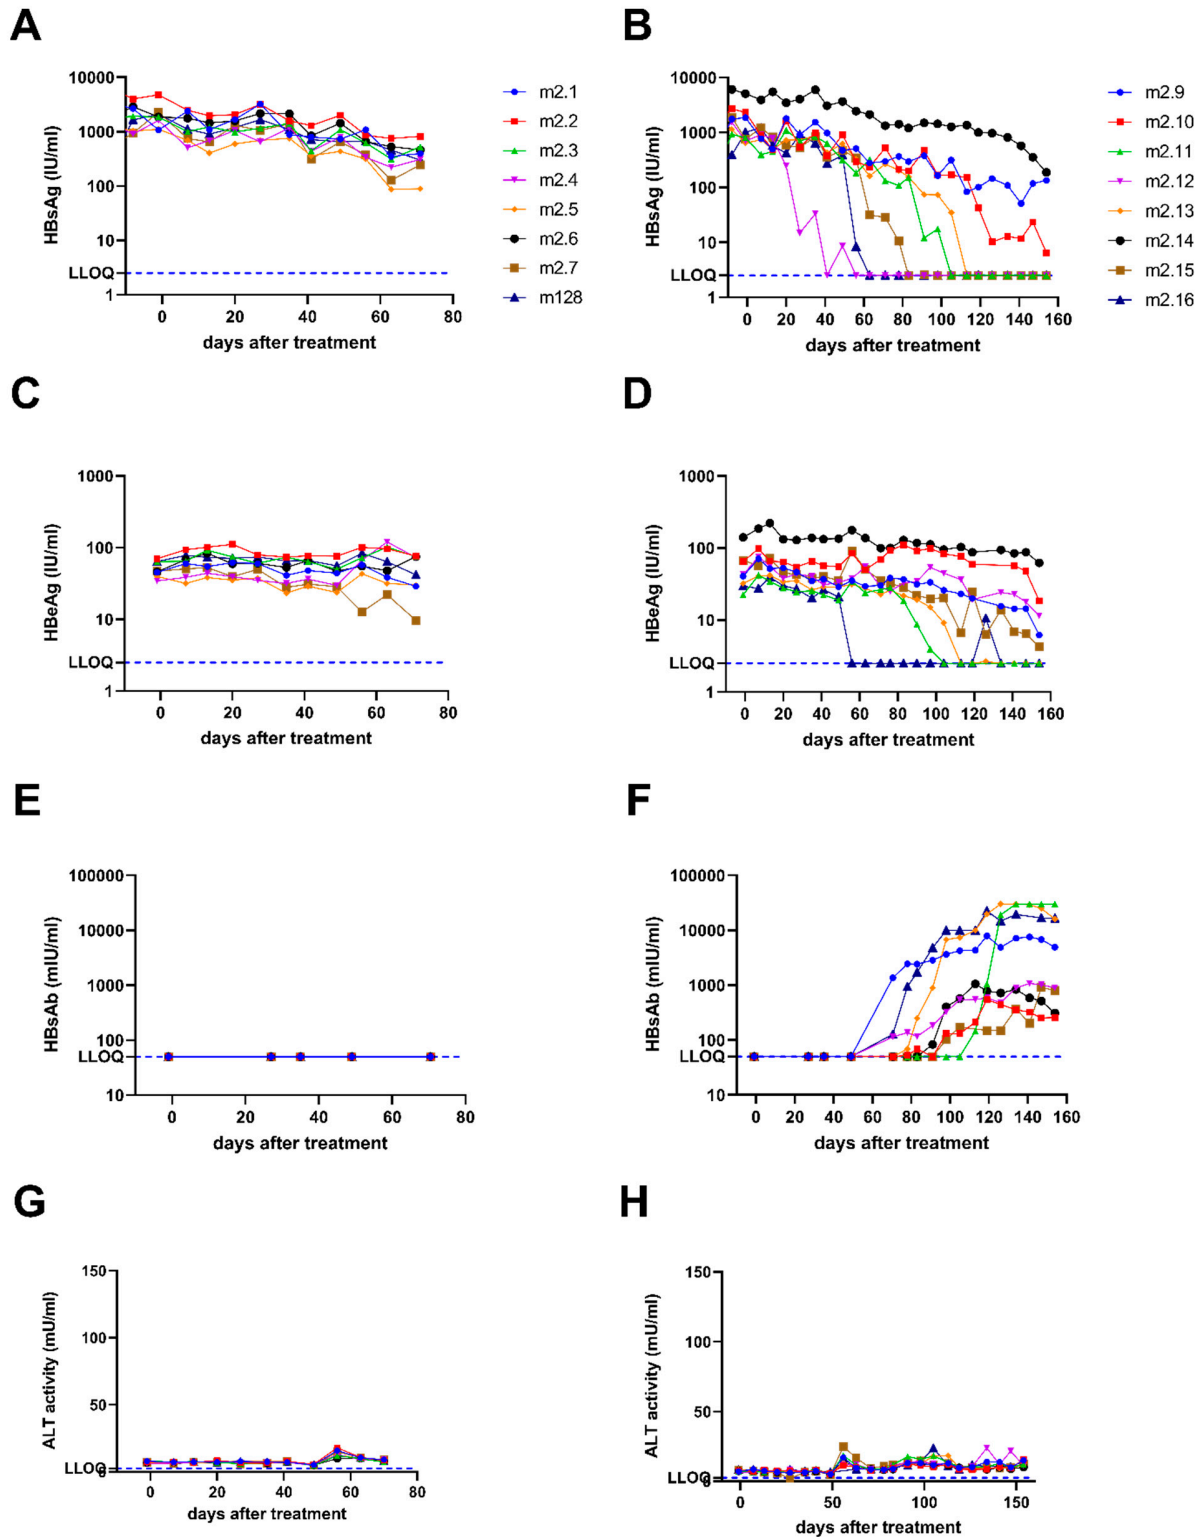

**Figure S4- Viral parameters over time of individual mice that were initially transduced with  $2.5 \times 10^9$ vg/ml rAAV-HBV and treated with GalNAc-control siRNA and therapeutic vaccine.** Individual-level data are shown; the data corresponds to the mean data plotted in Figure 1. **(A)** Hepatitis B surface antigen levels (HBsAg levels) in IU/ml measured in serum until day 70. **(B)** HBsAg levels in IU/ml measured in serum until day 154. **(C)** Hepatitis B e antigen levels (HBeAg) in IU/ml measured in serum until day 70. **(D)** HBeAg levels in IU/ml measured in serum until day 154. **(E)** Hepatitis B surface antibody levels (HBsAb) in mIU/ml measured in serum until day 70. **(F)** HBsAb levels in mIU/ml measured in serum until day 154. **(G)** alanine aminotransferase (ALT) activity in mU/ml measured in serum until day 70. **(H)** ALT levels measured in serum until day 154

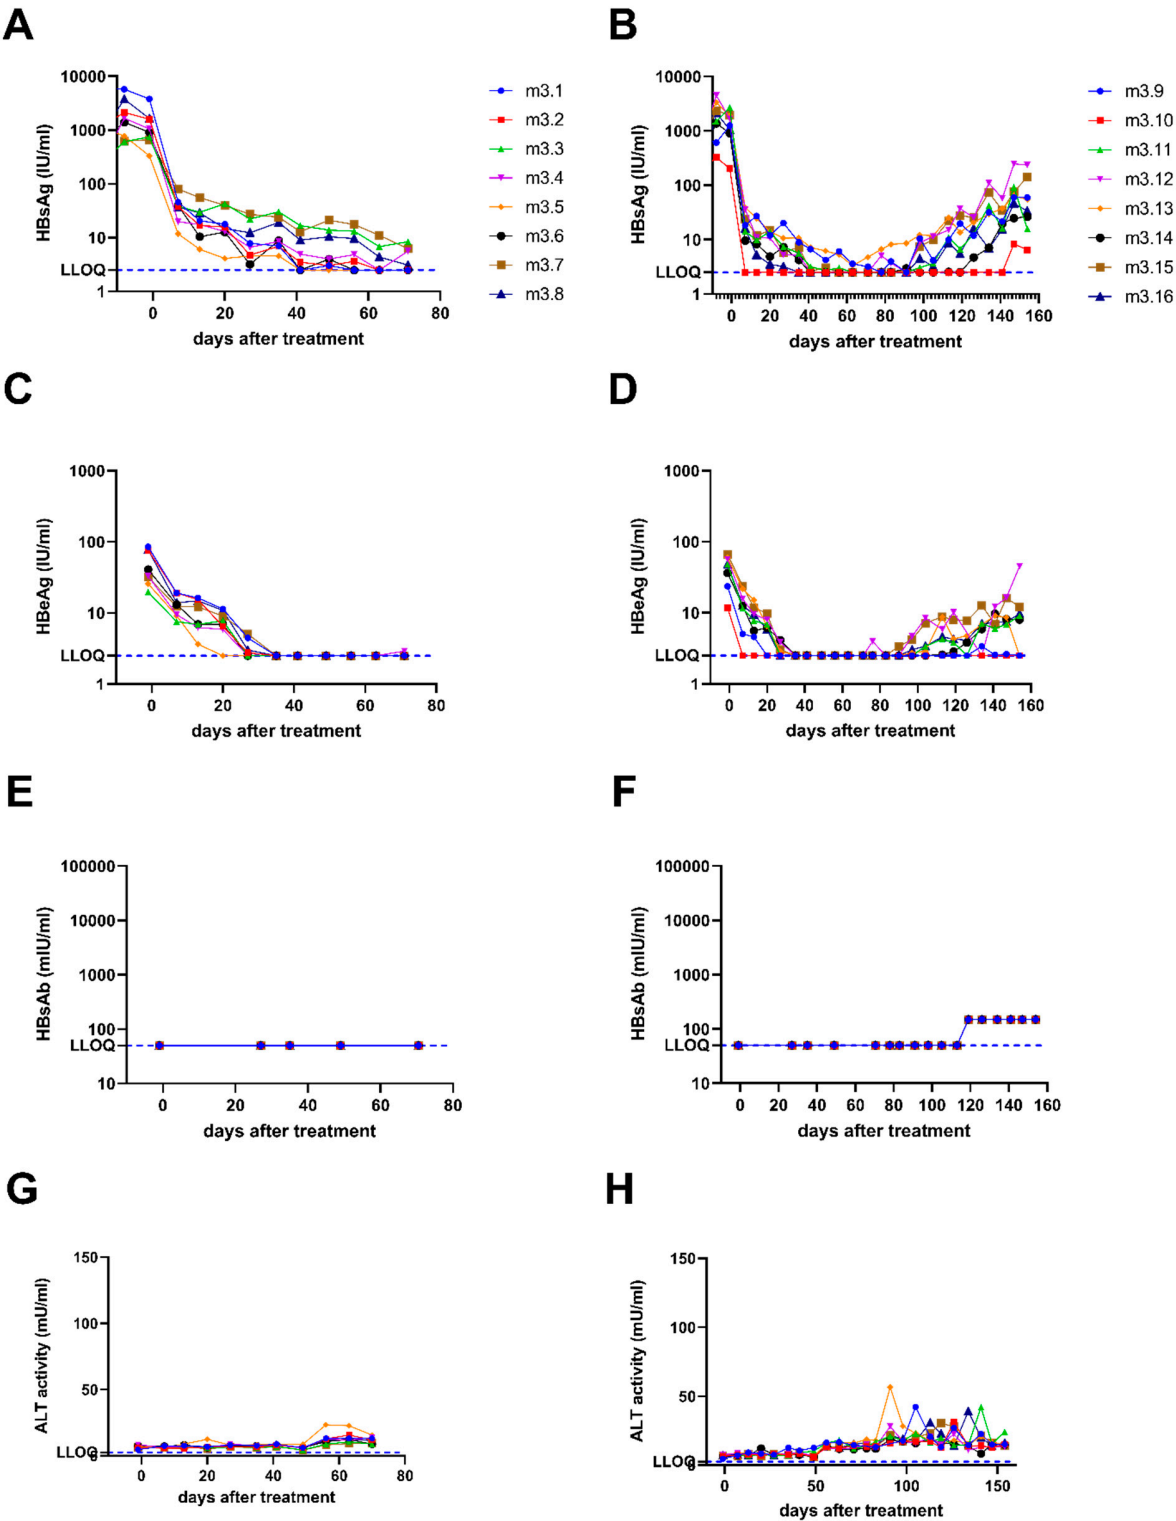

**Figure S5- Single-cell RNA sequencing QC and annotation.** AAV-HBV transduced C57BL/6 mice were treated with GalNAc-HBV siRNA and therapeutic vaccine (G1), with GalNAc-control siRNA and therapeutic vaccine (G2) and with GalNAc-control siRNA and mock vaccine (G3). Intrahepatic immune cells from liver were isolated 1 week after the administration of the second therapeutic vaccine (timepoint day 70) or 7 weeks after the 4<sup>th</sup> therapeutic vaccine (timepoint day 154). **(A)** Number of cells after QC per sample **(B)** Dendrogram of the levels of cell annotation and cell numbers.

a

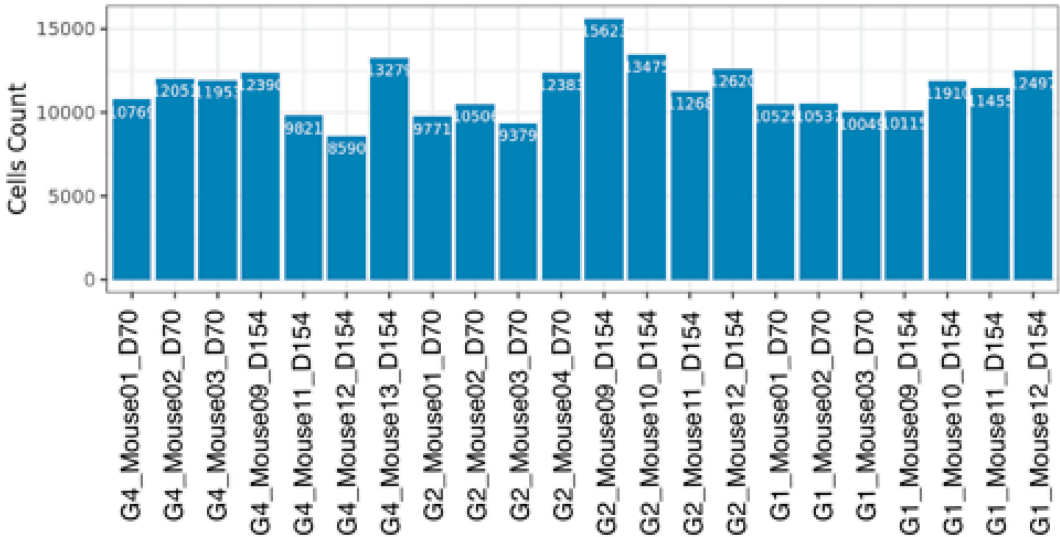

b

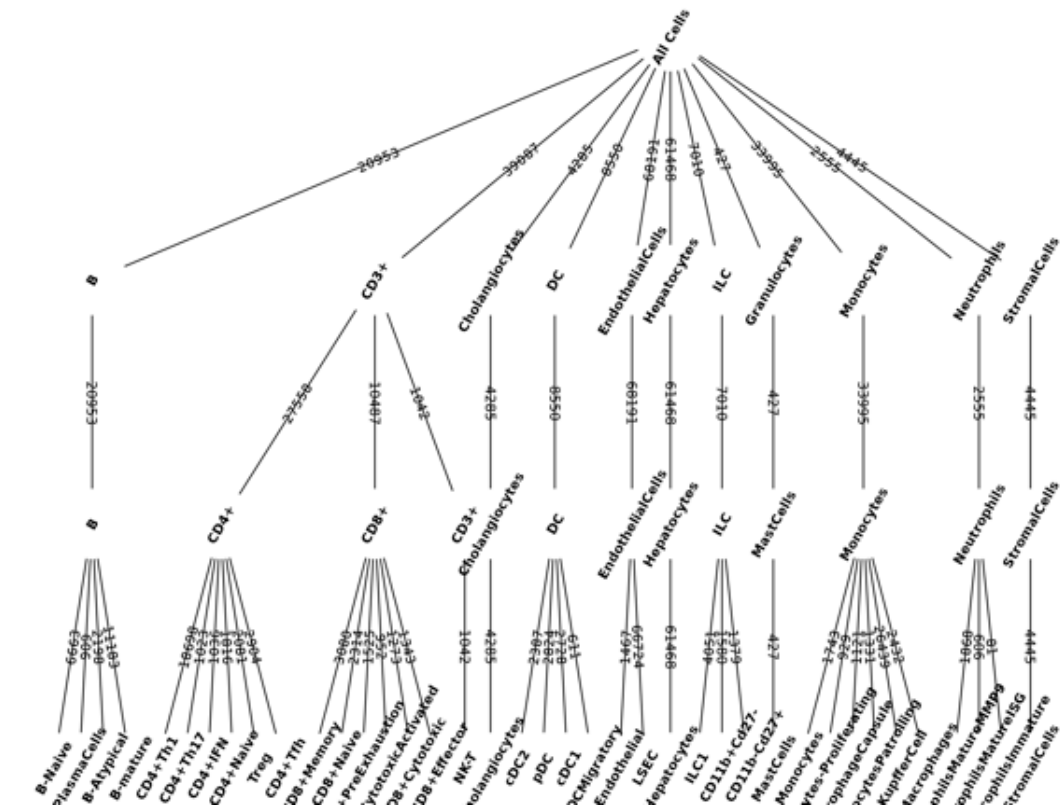

**Figure S6 – CD8 T cell frequency and pre-exhaustion profiles.** AAV-HBV transduced C57BL/6 mice were treated with GalNAc-HBV siRNA and therapeutic vaccine, with GalNAc-control siRNA and therapeutic vaccine and with GalNAc-control siRNA and mock vaccine. Intrahepatic immune cells from liver were isolated 1 week after the administration of the second therapeutic vaccine (timepoint day 70) or 7 weeks after the 4<sup>th</sup> therapeutic vaccine (timepoint day 154). **(A)** Frequency of CD8 T cells across groups and statistical comparison at day 154 (paired wilcox test, non-parametric) with fdr adjustment. CD8+Cytotoxic at day 154 from GalNAc-HBV siRNA and therapeutic vaccine vs mock control was significant ( $p=0.029$ ,  $p.adj=0.087$ ). CD8+PreExhaustion at day 154 from GalNAc-HBV siRNA and therapeutic vaccine vs mock control was significant ( $p=0.029$ ,  $p.adj=0.0855$ ). CD8+CentralMemory at day 154 from GalNAc-HBV siRNA and therapeutic vaccine vs mock control was significant ( $p=0.029$ ,  $p.adj=0.0435$ ) and from GalNAc-HBV siRNA and therapeutic vaccine vs GalNAc-control siRNA and therapeutic vaccine ( $p=0.029$ ,  $p.adj=0.0435$ ). CD8+CytotoxicActivated at day 154 from GalNAc-HBV siRNA and therapeutic vaccine vs G4 was significant ( $p=0.026$ ,  $p.adj=0.039$ ) and from GalNAc-HBV siRNA and therapeutic vaccine vs GalNAc-control siRNA and therapeutic vaccine ( $p=0.026$ ,  $p.adj=0.039$ ). **(B)** CD8 pre-exhaustion T cells dot plot of scaled expression of Tcf7 and Id3 across the different groups.

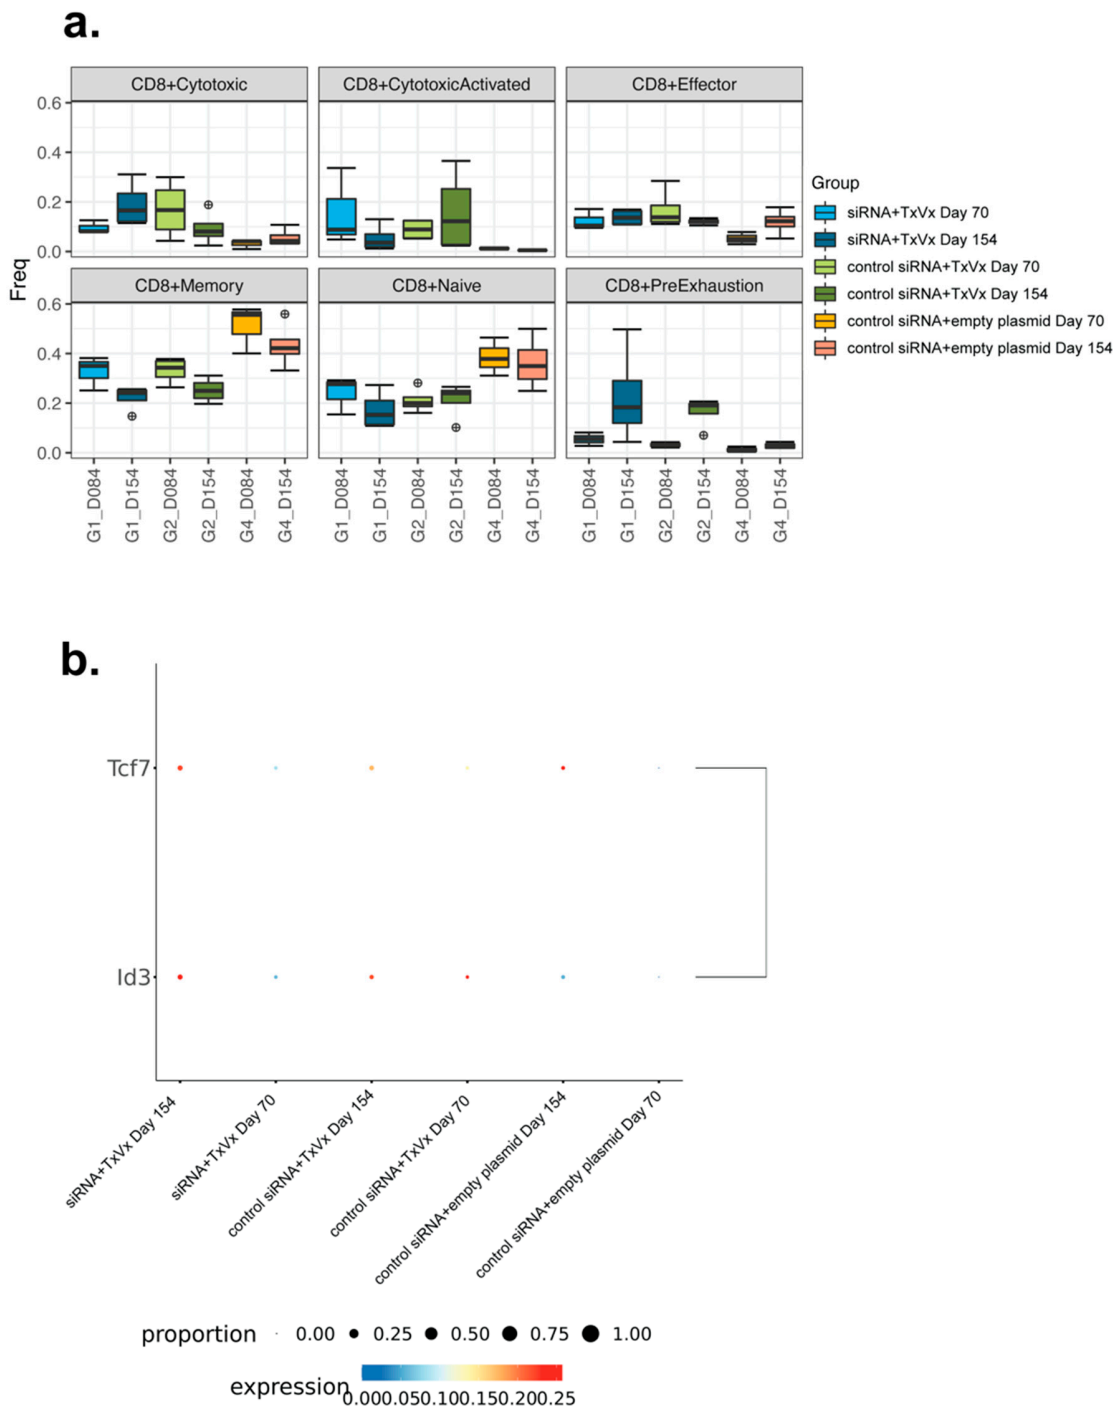



**Figure S7 – Monocyte and DC compartment frequency analysis.** AAV-HBV transduced C57BL/6 mice were treated with GalNAc-HBV siRNA and therapeutic vaccine, with GalNAc-control siRNA and therapeutic vaccine and with GalNAc-control siRNA and mock vaccine. Intrahepatic immune cells from liver were isolated 1 week after the administration of the second therapeutic vaccine (timepoint day 70) or 7 weeks after the 4<sup>th</sup> therapeutic vaccine (timepoint day 154). **(A)** Frequency of dendritic cells across groups and statistical comparison at day 154 (paired wilcox test, non-parametric, fdr adjustment). pDCs at day 154 from GalNAc-HBV siRNA and therapeutic vaccine vs GalNAc-control siRNA and therapeutic vaccine were significant ( $p=0.029$ ,  $p_{adj}=0.087$ ). Migratory DCs at day 154 from GalNAc-HBV siRNA and therapeutic vaccine vs mock control were significant ( $p=0.029$ ,  $p_{adj}=0.057$ ). **(B)** Frequency of Monocytes/Macrophages across groups and statistical comparison at day 154 (paired wilcox test, non-parametric, fdr adjustment). Macrophage Capsule at day 154 from GalNAc-HBV siRNA and therapeutic vaccine vs mock control was significant ( $p=0.029$ ,  $p_{adj}=0.087$ ).

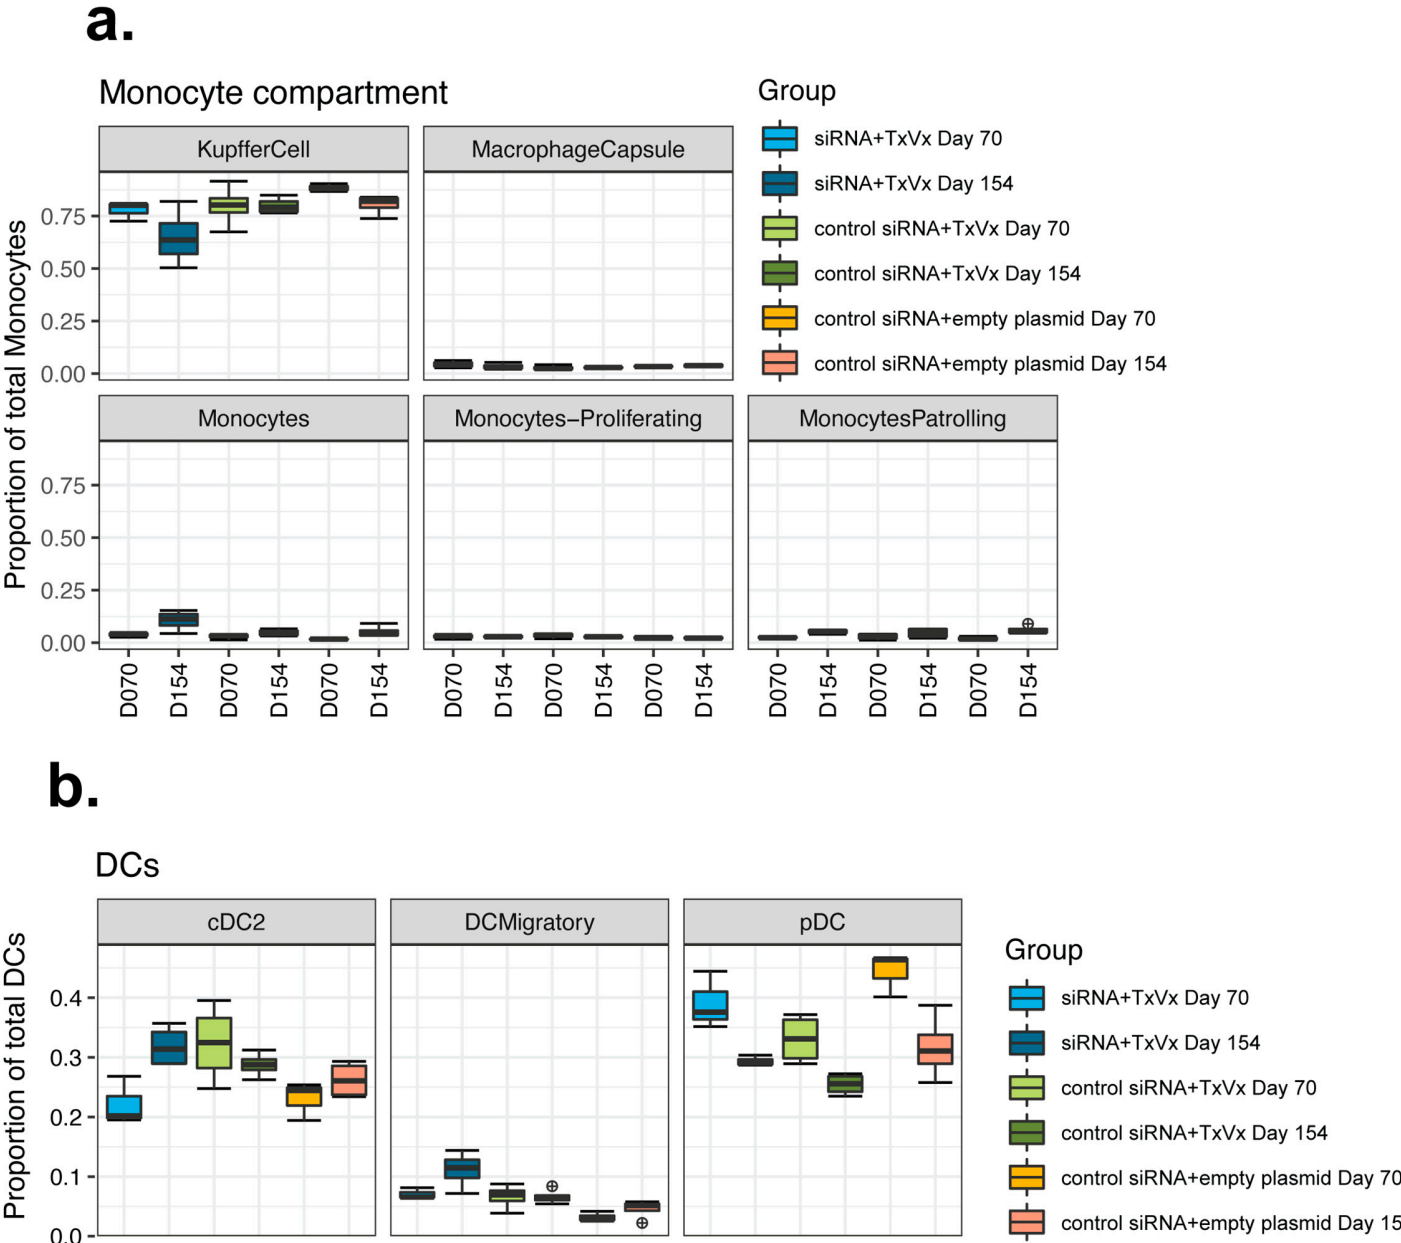



**Figure S8– Neutrophil compartment analysis.** AAV-HBV transduced C57BL/6 mice were treated with GalNAc-HBV siRNA and therapeutic vaccine, with GalNAc-control siRNA and therapeutic vaccine and with GalNAc-control siRNA and mock vaccine. Intrahepatic immune cells from liver were isolated 1 week after the administration of the second therapeutic vaccine (timepoint day 70) or 7 weeks after the 4<sup>th</sup> therapeutic vaccine (timepoint day 154). **(a)** Dotplot of scaled expression of hallmark genes in the neutrophil compartment. **(b)** Violin plots of normalized expression of IFN/activation genes (*Isg15*, *Cd274*, *Rsad2*) and immunosuppressive genes (*Arg1*, *Mmp9*, *Mmp8*)

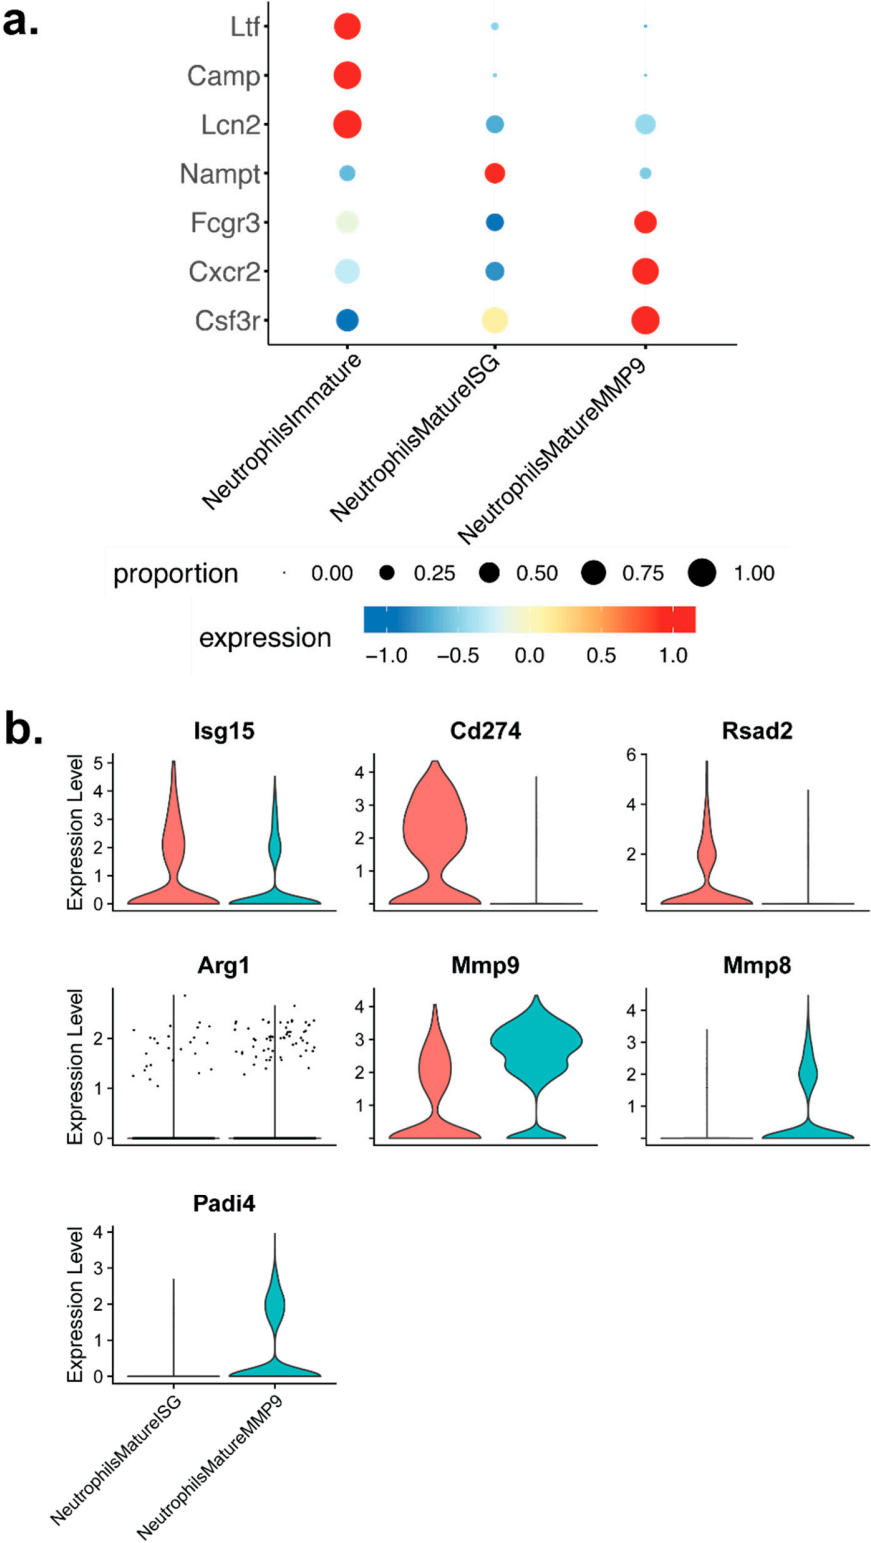

**Figure S9 – ILC compartment frequency analysis.** AAV-HBV transduced C57BL/6 mice were treated with GalNAc-HBV siRNA and therapeutic vaccine, with GalNAc-control siRNA and therapeutic vaccine and with GalNAc-control siRNA and mock vaccine. Intrahepatic immune cells from liver were isolated 1 week after the administration of the second therapeutic vaccine (timepoint day 70) or 7 weeks after the 4<sup>th</sup> therapeutic vaccine (timepoint day 154). **(A)** Frequency of ILCs across groups and statistical comparison at day 154 (paired wilco test, non-parametric) with fdr adjustment. NK\_CD11b+Cd27-at day 154 from GalNAc-HBV siRNA and therapeutic vaccine vs mock control were significant (p=0.029, p.adj=0.087). **(B)** Dot plot with scaled expression of hallmark genes in the ILC compartment.

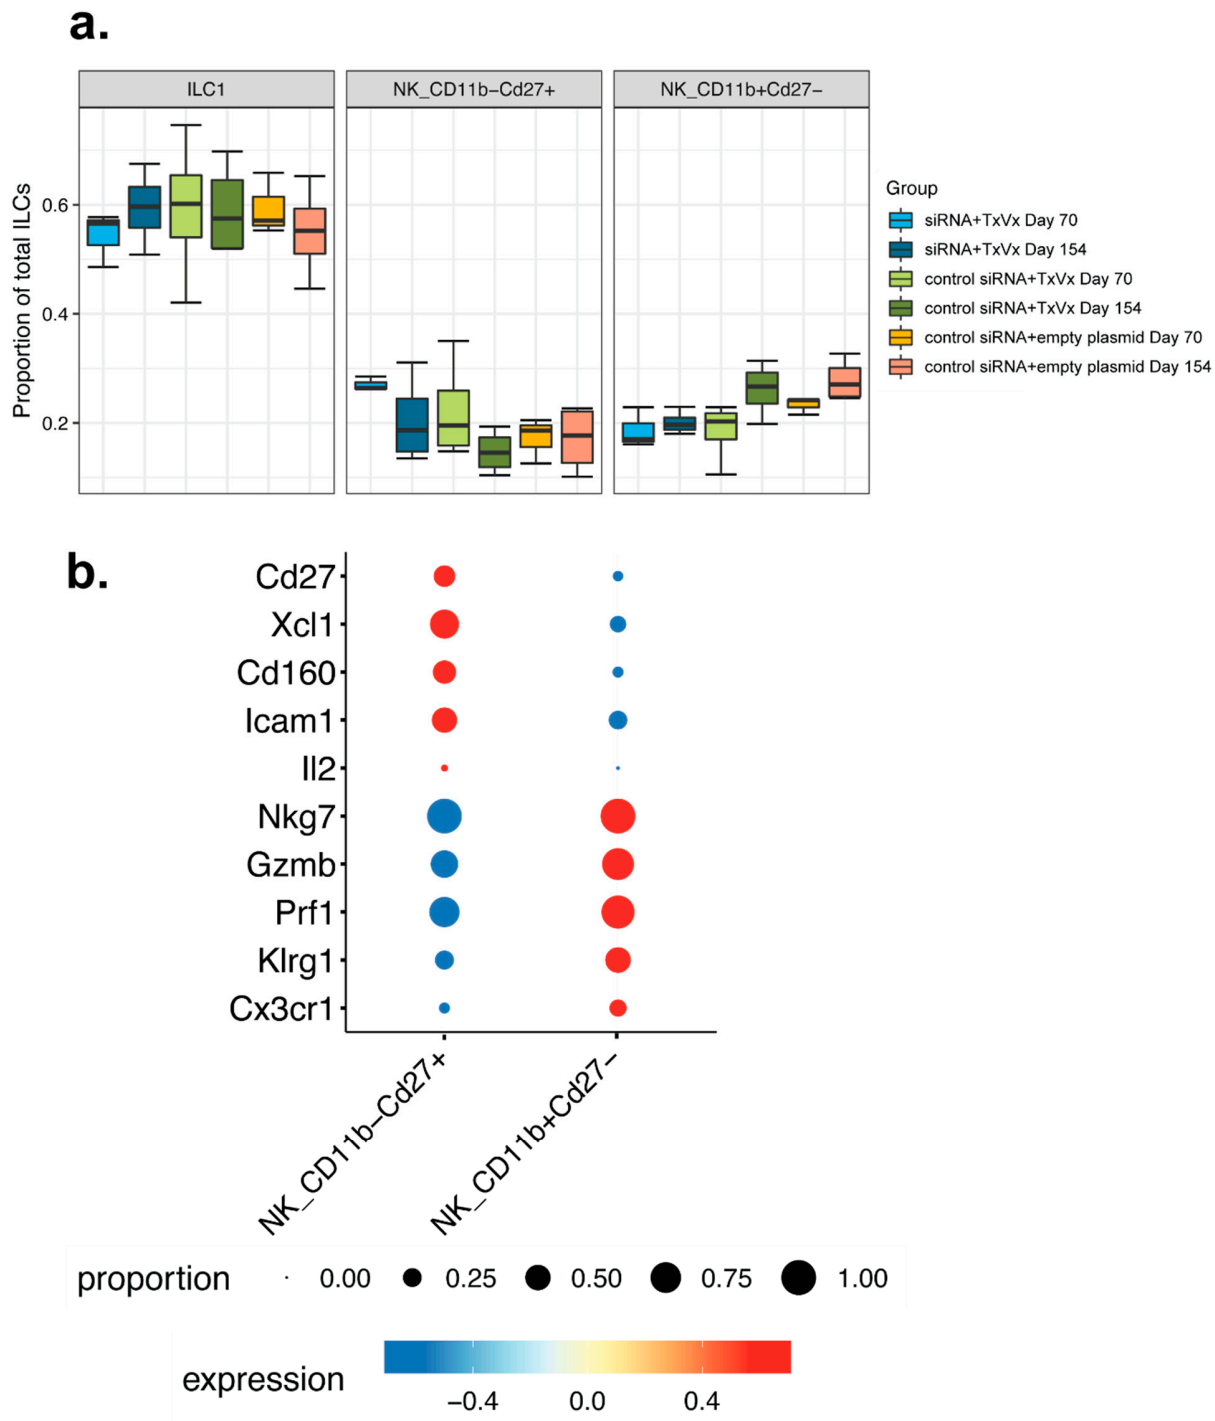

**Figure S10 –TCR clonality frequency** AAV-HBV transduced C57BL/6 mice were treated with GalNAc-HBV siRNA and therapeutic vaccine (G1), with GalNAc-control siRNA and therapeutic vaccine (G2) and with GalNAc-control siRNA and mock vaccine (G4). Intrahepatic immune cells from liver were isolated 1 week after the administration of the second therapeutic vaccine (timepoint day 70) or 7 weeks after the 4<sup>th</sup> therapeutic vaccine (timepoint day 154). **(A)** Frequency of the TCR clonal expansion in the CD4 compartment per group **(B)** Frequency of the TCR clonal expansion in the CD8 compartment per group.

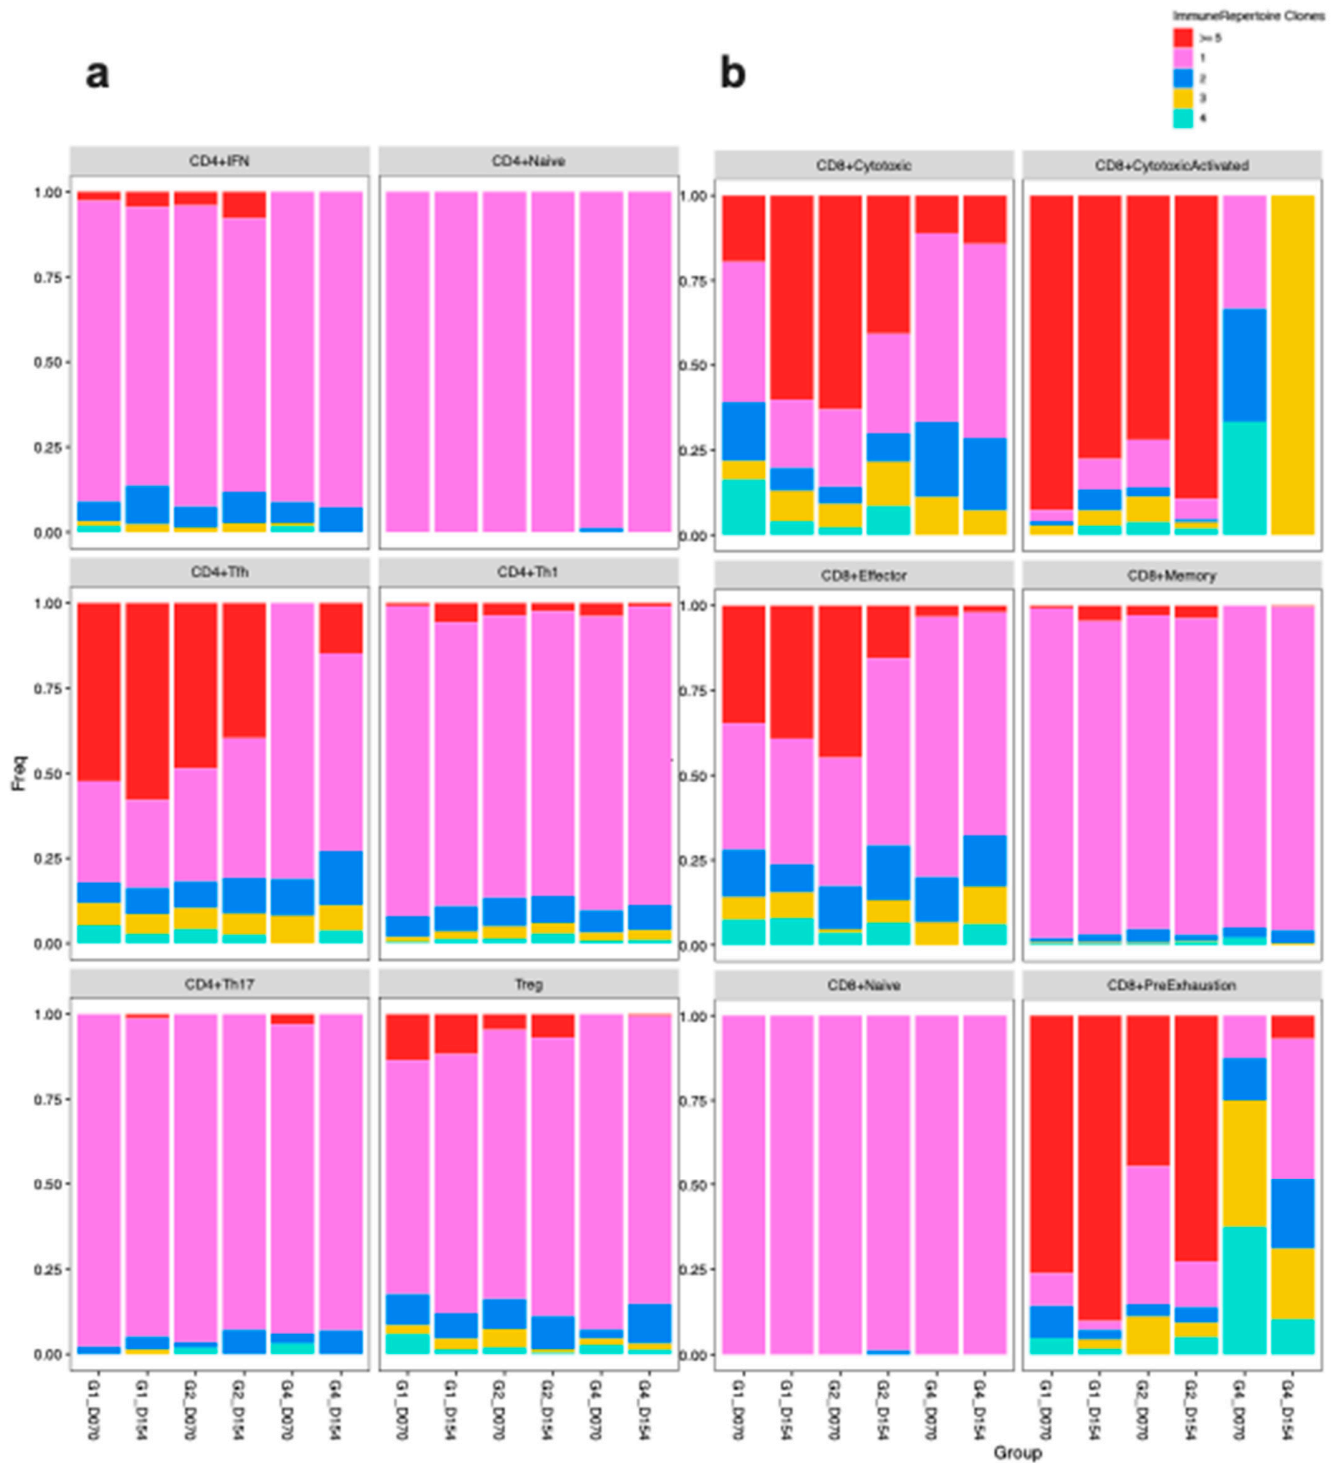

**Figure S11 – B cell compartment analysis.** AAV-HBV transduced C57BL/6 mice were treated with GalNAc-HBV siRNA and therapeutic vaccine (G1), with GalNAc-control siRNA and therapeutic vaccine (G2) and with GalNAc-control siRNA and mock vaccine (G4). Intrahepatic immune cells from liver were isolated 1 week after the administration of the second therapeutic vaccine (timepoint day 70) or 7 weeks after the 4<sup>th</sup> therapeutic vaccine (timepoint day 154). **(A)** Violin plots of normalized expression from B-cell marker genes for each cell subtype **(B)** Frequency of the BCR clonal expansion in each B cell subtype, in red are depicted the expanded clonotypes. **(C)** Dotplot of scaled expression of Long-Lived Plasma Cell marker genes in Plasma cells, across clonality groups,  $\geq 3$  clonotypes are expanded. **(D)** Phylogeny analysis from B cell clones (CDR3 sequences) of samples from the siRNA and therapeutic vaccine combination **(E)** from the control siRNA and therapeutic vaccine treatment **(F)** and from the control siRNA and empty plasmid.

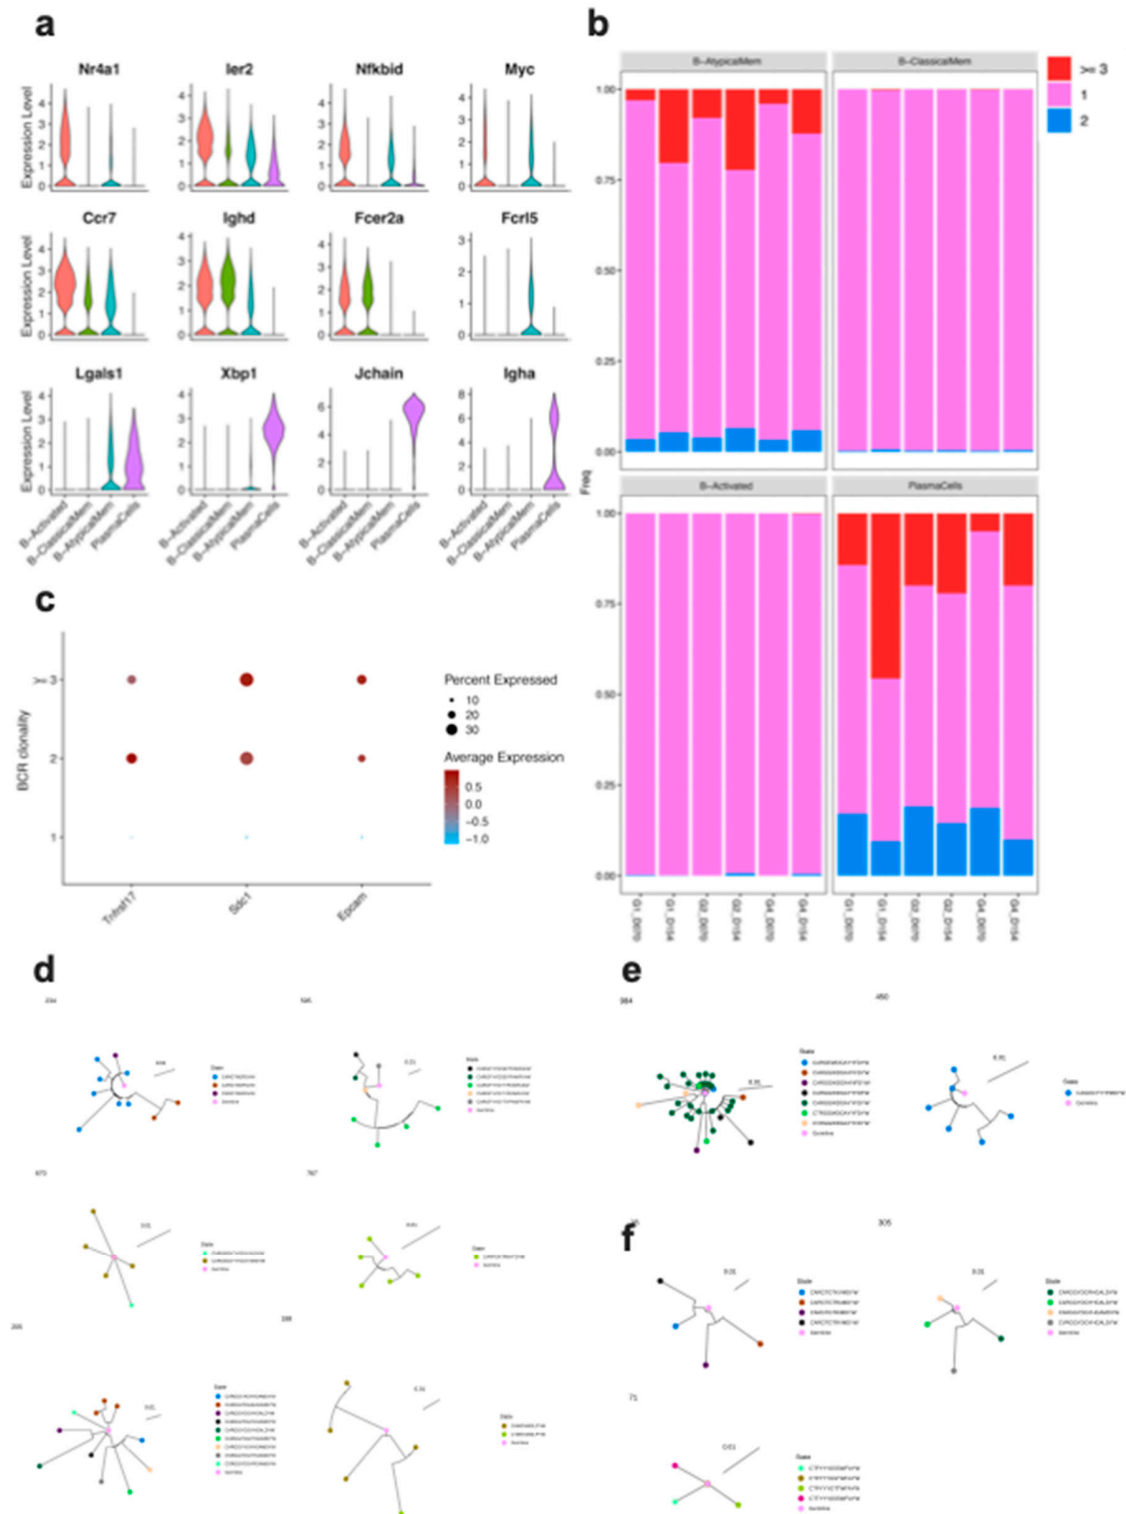

**Supplementary Table S1 – Percentage distribution of cell types**

| CellType         | TotalCells | Percentage |
|------------------|------------|------------|
| B                | 20953      | 8          |
| CD3+             | 39087      | 16         |
| Cholangiocytes   | 4285       | 2          |
| DC               | 8550       | 3          |
| EndothelialCells | 68191      | 27         |
| Granulocytes     | 427        | 0          |
| Hepatocytes      | 61468      | 24         |
| ILC              | 7010       | 3          |
| Monocytes        | 33995      | 14         |
| Neutrophils      | 2555       | 1          |
| StromalCells     | 4445       | 2          |
| Totals           | 250966     | 100        |

**Supplementary Table S2 – Frequency distribution of clonal expansion in CD8 total T cells**

| Group                     | Timepoint | CellType | Clonality | Proportion |
|---------------------------|-----------|----------|-----------|------------|
| siRNA+TxVx                | D070      | Cd8      | >= 5      | 32.82      |
| siRNA+TxVx                | D154      | Cd8      | >= 5      | 53.31      |
| controlsRNA+TxVX          | D070      | Cd8      | >= 5      | 30.87      |
| controlsRNA+TxVX          | D154      | Cd8      | >= 5      | 38.75      |
| controlsRNA+empty plasmid | D070      | Cd8      | >= 5      | 0.72       |
| controlsRNA+empty plasmid | D154      | Cd8      | >= 5      | 2.02       |

**Supplementary Table S3 – Frequency distribution of clonal expansion in CD4 total T cells**

| Group                     | Timepoint | CellType | Clonality | Percentage |
|---------------------------|-----------|----------|-----------|------------|
| siRNA+TxVx                | D070      | Cd4      | >= 5      | 7.94       |
| siRNA+TxVx                | D154      | Cd4      | >= 5      | 23.28      |
| controlsRNA+TxVX          | D070      | Cd4      | >= 5      | 9.17       |
| controlsRNA+TxVX          | D154      | Cd4      | >= 5      | 9.80       |
| controlsRNA+empty plasmid | D070      | Cd4      | >= 5      | 3.40       |
| controlsRNA+empty plasmid | D154      | Cd4      | >= 5      | 1.51       |
